# Supplementary material for: Cell-Specific Transcriptional Profiling Reveals Candidate Mechanisms Regulating Development and Function of Uterine Epithelia in Mice
Source: PubMed Central journal article supplement — Biol Reprod. 2013 Oct 1;89(4):86, 1-10. doi: 10.1095/biolreprod.113.111971 (PMC7289334; doi:10.1095/biolreprod.113.111971), 2013-10-01
Supplement: supptables1.pdf [file supptables1.pdf]

**Supplementary Table S1. Primer information for qPCR analysis.**

| mRNA           | Primers (5'-3')    |                                               | Product size (bp) | GenBank accession number |
|----------------|--------------------|-----------------------------------------------|-------------------|--------------------------|
| <i>Bpibf5</i>  | forward<br>reverse | TCTTCCTCCCATCATCTCTG<br>GCTCCCTCTGTGAACTCT    | 72                | NM_144890.2              |
| <i>Calb1</i>   | forward<br>reverse | GGAGCTATCACCGAAATGAA<br>CATCGAAAGAGCAGCAAGAA  | 126               | NM_009788.4              |
| <i>Cda</i>     | forward<br>reverse | ATAGAAAACGCCTGCTACCC<br>GCCCTGAAATCCTTGTACCC  | 89                | NM_028176.1              |
| <i>Clca3</i>   | forward<br>reverse | CCCTCCAGCCTCTCCTCTTT<br>TTCATTTTTGCGATGTCCTTT | 67                | NM_013737.5              |
| <i>Ctsl</i>    | forward<br>reverse | CTTTTGGCTGTCTCTGCTT<br>CGCTCTCCTCCACTCTTCCT   | 135               | NM_009984.3              |
| <i>Cxcl15</i>  | forward<br>reverse | GGCATCTTCGTCCGTCCTT<br>CTATCACTTCCTTCTGT      | 142               | NM_011339.2              |
| <i>Foxa2</i>   | forward<br>reverse | AGCAGAGCCCCAACAAGA<br>AGAGAGAGTGGCGGATGGAG    | 117               | NM_010446.2              |
| <i>Gapdh</i>   | forward<br>reverse | CAACTACATGGTCTACATGTT<br>CTCGCTCCTGGAAGATG    | 122               | NM_008084.2              |
| <i>Gas6</i>    | forward<br>reverse | ATGTCGTCCCATCTCT<br>GTCGCACACCTTGATTTCC       | 122               | NM_019521.2              |
| <i>Hdc</i>     | forward<br>reverse | ACGGCACAGAAATGGCTAAA<br>CAGACGGAAAACCAACAAAC  | 101               | NM_008230.5              |
| <i>Irg1</i>    | forward<br>reverse | CCAAGGAAGCCAAAGACATA<br>CCAGAGTCCCCACCACAGA   | 60                | NM_008392.1              |
| <i>Lif</i>     | forward<br>reverse | CGCCTCCCTGACCAATAT<br>GCACAGACGGCAAAGCAC      | 130               | NM_008501.2              |
| <i>Lifr</i>    | forward<br>reverse | GCCGAGGATTCAACTTACC<br>CACTCCACCTGCTCCAC      | 112               | NM_001113386.1           |
| <i>Prss29</i>  | forward<br>reverse | TCACCAAGAAGGATGTGT<br>CTGCTGTAGGCGGTAG        | 86                | NM_053260.3              |
| <i>Ptgs2</i>   | forward<br>reverse | GAGCACCTTTGGAGGCGA<br>CTGTTTTGGTAGGCTGTGGA    | 131               | NM_011198.3              |
| <i>Sfn</i>     | forward<br>reverse | CGAGCAGAAGAGCAACG<br>TCCAGCCCCTTTGATGAG       | 142               | NM_018754.2              |
| <i>Slc1a1</i>  | forward<br>reverse | GAGATTTGTGCTGCCTGTTG<br>TGGCTGTAATGCTGATGGTG  | 140               | NM_009199.2              |
| <i>Slc5a11</i> | forward<br>reverse | ACTCAGCACACCAGAAACC<br>AGACACACCATCGCCACA     | 131               | NM_146198.2              |
| <i>Spink3</i>  | forward<br>reverse | AACGCATAGAGCCTGTCTT<br>ACGAACCCACTTGCCAAA     | 100               | NM_009258.5              |
